# Supplementary material
Source: PubMed Central journal article supplement (PMC4291654)
Supplement: pnas.1421127112.sapp.pdf [file pnas.1421127112.sapp.pdf]

Supporting Online Material for

Rare allele of a previously unidentified histone H4 acetyltransferase enhances  
grain weight, yield and plant biomass in rice

Xian-Jun Song<sup>1</sup>, Takeshi Kuroha, Madoka Ayano, Tomoyuki Furuta, Keisuke Nagai, Norio Komeda, Shuhei Segami, Kotaro Miura, Daisuke Ogawa, Takamasa Suzuki, Tetsuya Higashiyama, Takumi Kamura, Masanori Yamasaki, Hitosh Mori, Yoshiaki Inukai, Jianzhong Wu, Hidemi Kitano, Hitoshi Sakakibara, Steven E. Jacobsen<sup>1</sup>,  
and Motoyuki Ashikari<sup>1</sup>

<sup>1</sup>To whom correspondence should be addressed. Email: [songxj@ibcas.ac.cn](mailto:songxj@ibcas.ac.cn) (X.J.S.)  
[jacobsen@ucla.edu](mailto:jacobsen@ucla.edu) (S.E.J.), [ashi@agr.nagoya-u.ac.jp](mailto:ashi@agr.nagoya-u.ac.jp) (M.A.)

**This PDF file includes**

Materials and Methods

Figure and Table database Legends

References

## SUPPORTING ONLINE MATERIAL

### Materials and Methods

**Plant populations and quantitative trait locus (QTL) analysis.** A set of backcrossed inbred lines (BILs) containing 98 individual lines was grown in the paddy field of Nagoya University, Aichi Prefecture, Japan, in 2007, under standard cultivation conditions. An average of 1,000-grain weight of five individual plants from each of the BILs was obtained after harvesting and air-drying for around one month. The grain weight of the BILs was used as the phenotype for QTL detection.

A chromosomal segment substituted line, CSSL29, was chosen and crossed with the Nipponbare (Nipp) line to produce an F<sub>2</sub> population for QTL mapping. Markers xj112 and xj113 on the long arm of rice chromosome 6 were chosen as a result of the segregation of the desired genotype and grain weight phenotype on the F<sub>2</sub> population. The F<sub>2</sub> and correspondingly derived F<sub>3</sub> populations were used for marker-assisted QTL mapping, and *GW6* was mapped to the candidate region spanned by xj112 and xj113. To further map *GW6a* locus, progeny testing of homozygous recombinant plants was performed with the aid of newly developed molecular markers; and we selected the NIL(*OsglHAT1*) that has a fixed Nipp genotype at *GW6b* locus from a F<sub>5</sub> generation by DNA marker assistance. Relevant marker sequences can be found in **Table S1**.

**Transgenic assays in rice plants.** We screened a Kasalath (Kasa) genomic DNA library using markers that define the *GW6a* locus (xj-6 and xj-11), and identified a positive BAC clone, BAC\_K0242A07. Partially digested fragments of BAC\_K0242A07 by the endogenous restriction enzyme *HindIII* were segregated, recovered and inserted into vector pYLTAC7 (1). We verified the vectors by sequence analysis and used them for transgenic assays in rice as described previously (2). The full-length *OsglHAT1* cDNA ORF was amplified from the CS tissue (see Text) of both Nipp and CSSL29 plants and cloned into the plant binary vector pHB (3) for over-expression of *OsglHAT1*, whereas down-regulation of the gene was obtained via the insertion of *OsglHAT1*<sup>N</sup> cDNA ORF in the

antisense orientation. Furthermore, we generated a series of amino acid swaps in *OsglHAT1* alleles (**Figure S4A**) by PCR amplification of mixed allele templates derived from restriction enzyme digestions, and then cloned them into the binary vector described above. We have a total of 16 *OsglHAT1N*-OE (7 of these showed significantly enlarged grains in T0 generation) and 11 *OsglHAT1K*-OE (4 of these produced enlarged grains in T0 generation) independent transgenic lines in rice plants, and we used typical transgenes (that were confirmed by RT-PCT experiments) in Figure C in the text.

**Generation of transgenic *Arabidopsis* expressing *OsglHAT1*.** The *OsglHAT1* coding region from Nipp and Kasa were amplified by RT-PCR using the primers 5'-caccatggtggagacgacgacg-3' and 5'-ttagaactcgcgggggtcgacg-3', ligated into the pENTR/D-TOPO vector (Invitrogen), and then integrated into the Gateway binary vector pBA002Gw-HA (a derivative of pBA002-HA) (4) using LR clonase (Invirtogen). These constructs were introduced into *Arabidopsis* plants by the floral dip method (5). T3 homozygous progeny were used for these experiments. We totally assayed 4 and 3 independent transgenic *Arabidopsis* lines of *OsglHAT1N*-OE and *OsglHAT1K*-OE, respectively, whose phenotypes are segregating in T2 generation.

**RNA extraction, cDNA synthesis and RT-PCR.** Total RNA was isolated by using the RNeasy Plant Mini Kit (Qiagene) and then digested by recombinant DNase I (RNase-free, Takara) to remove possible genomic DNA contamination, following the manufacturer's instructions; the resulting total RNA was quantified using a NanoDrop 2000 spectrophotometer (Thermo Fisher Scientific). For first-strand cDNA synthesis, 2 µg of total RNA for each sample was used for reverse transcription using Omniscript Reverse Transcriptase (Qiagene) according to the standard protocol of the manufacturer. The synthesized cDNA was then diluted 1:5 with milli-Q water and used directly for RT-PCR and qPCR reactions.

qPCR was performed on the thermal cycler CFX96 Real-time PCR System (Bio-Rad) using the SYBR Green PCR Master Mix (Bio-Rad) and the primers listed in **Table S1**. The

relative expression level was normalized to ubiquitin. Each analysis was performed in triplicate.

**Protein preparation and assays for HAT activity.** For the *in vitro* HAT assay, we cloned cDNA ORF encoding the *OsglHAT1* Nipp or Kasa alleles into pET32a (+). *Escherichia coli* BL21 (DE3) pLysS Rosetta-gami 2 (Novagen) was used as a host strain for the production of recombinant fusion HIS-OsglHAT1 proteins. The induction and purification of these proteins were performed as described in the manufacturer's protocol. We purchased a fluorescent HAT Assay Kit (Active Motif) and followed the manufacturer's instructions with the following modifications: the reaction mixture of 30  $\mu$ l containing 5  $\times$  HAT assay buffer, 2  $\mu$ l acetyl-CoA (0.5 mM), 1  $\mu$ l *Xenopus* chromatin (treatment of nucleus exaction of 2  $\times$  10<sup>8</sup> blood cell per milliliter) and the indicated volume of protein (purified fusion or HIS-tag only) was incubated at 30°C for 1.5 h. One third of each reaction mixture, 10  $\mu$ l, was resolved in 15% SDS-PAGE for a Western blot probed for acetylation of Histone H4 (anti-H4Ac, Millipore).

For the *in vivo* HAT assay, we harvested 1.5 g of young panicle samples from both transgenic *OsglHAT1*-OE and vector control plants, ground them to powder in liquid nitrogen and suspended the samples in extraction buffer I (400 mM Sucrose, 10 mM Tris-Cl, pH 8.0, 10 mM MgCl<sub>2</sub>, 5 mM  $\beta$ -mercaptoethanol, and complete protease inhibitor cocktail [Roche]). Nuclei preparations were prepared by using extraction buffer II (250 mM Sucrose, 10 mM Tris-Cl, pH 8.0, 10 mM MgCl<sub>2</sub>, 1% Triton X-100, 5 mM  $\beta$ -mercaptoethanol, and complete protease inhibitor cocktail) and extraction buffer III (1.7 M Sucrose, 10 mM Tris-Cl, pH 8.0, 0.15% Triton X-100, 2 mM MgCl<sub>2</sub>, 5 mM  $\beta$ -mercaptoethanol, and complete protease inhibitor cocktail). The pellets were suspended in nuclear lysis buffer (10 mM Tris-Cl, pH 8.0, 1% SDS, 10 mM EDTA, and complete protease inhibitor cocktail) for 30 minutes on ice. The reactions were stopped with 2 $\times$  SDS-PAGE loading buffer (95°C, 5 min), and samples were analyzed by 15% SDS-PAGE.

**In situ RNA hybridization.** A cDNA fragment was amplified by RT-PCR using the primer-set specific to *OsglHAT1* listed in **Table S1** and cloned into both pBluescript II SK+ and pBluescript II KS+ vectors, linearized and used for making digoxigenin-labelled sense and anti-sense probes, respectively. Sample fixation, section and *in situ* hybridization were performed as described previously (6).

**Subcellular localization and *OsglHAT1* promoter-GUS analysis.** We made a GFP-*OsglHAT1* (from Kasalath) in-frame fusion construct under the control of the CaMV 35S promoter and bombarded the construct into onion epidermal cells using the PDS-1000/He device (Bio-Rad). 4',6-diamidino-2- phenylindole (DAPI, pH 7.0) was used to stain nuclei of onion epidermal cells prior to examination of the transient expression of the bombarded samples using a Zeiss LSM700 confocal laser microscope. Using the primer set listed in **Table S1**, we amplified the *OsglHAT1* promoter segments from both parental genomic DNAs (*pOsglHAT1<sup>N</sup>*: 1,681 base pairs and *pOsglHAT1<sup>K</sup>*: 1,652 base pairs). We then inserted these segments into the binary vector pCAMBIA1300, generating transgenic rice plants carrying these constructs. GUS staining of tissues and organs of transgenic plants was carried out as described previously (7). The 20 day-old whole *pOsglHAT1<sup>N</sup>*-GUS and *pOsglHAT1<sup>K</sup>*-GUS transgenic plants were homogenized in an extraction buffer for crude protein extraction as described by Yamamoto *et al.* (8). For quantification of GUS activity, a MUG assay was conducted following the method described by Ge *et al.* (7).

**Transient expression assays in maize leaf protoplasts.** We inserted *pOsglHAT1<sup>N</sup>* and *pOsglHAT1<sup>K</sup>* fragments by a combination-digestion of *XhoI* and *BamHI* into the *NBS-LUC* control reporter construct (9) in which the 35S minimal promoter was replaced by the insertions. Transient expression assays using maize leaf protoplasts were carried out according to the protocol described by Studer *et al.* (10). Reporter assays were performed more than three times with similar results, and each assay contained three technical replicates per construct.

**Histological examination by scanning electron microscopy (SEM).** Spikelet hulls from NIL(*OsglHAT1*) and Nipp plants were collected before fertilization and fixed in FAA solution (50% ethanol, 5% glacial acetic acid and 5% formaldehyde). The inner epidermal cells of lemma of the spikelet hulls were observed by SEM (S-3000N, Hitachi, Tokyo, Japan). A central 4 mm<sup>2</sup> region of the lemma was photographed and > 50 cells per lemma were measured using ImageJ software (11).

**RNA-seq and GO analysis.** Total RNA was extracted from CS tissues containing shoot apical meristems of Nipp, *GW6a-4.6* and *OsglHAT1*-OE plants as described above. Single-end libraries were constructed using the Tru-seq RNA library construction kit (Illumina), and sequencing was performed on an Illumina Genome Analyzer Iix Sequencer. A total of 33 base pair single-end reads were aligned to the transcript sequence of the Nipp genome from IRGSP (<http://rapdb.dna.affrc.go.jp/download/archive/irgsp1/>) using Bowtie (12). Differentially expressed genes were identified through a pair-wise comparison using EdgeR (normalized with Tbt) (13). Two or three biological replicates were used in each genotype to identify transcripts showing significant differences (cut-off false discovery rate (FDR) < 0.05; fold change > 2) between wild type and *GW6a-4.6* or *OsglHAT1*-OE lines. Functional annotation of significantly different transcripts and enrichment analysis were performed with agriGO (14). Fisher's exact test was conducted to reveal significantly enriched GO terms and a representative set of GO terms was used in **Fig. S18**. The differentially expressed genes are listed in **Table Database S1** and gene ontology analysis data is available in **Table Database S2**.

**Sequence analysis of putative *OsglHAT1* homologs.** Using the *OsglHAT1*<sup>N</sup> (Nipp allele) amino acid sequence as a query string, we performed a sequence blast against the GenBank (NCBI) and RGP databases, identifying a total of 59 putative homologs of *OsglHAT1*. The phylogenetic tree shown in **Fig. S19** was constructed using GENETYX (Ver.10).

**Genetic diversity and coalescent simulation analyses.** We used a diverse set of rice accessions for the genetic diversity analysis in the *GW6a* region: 50 landraces of *indica*, 14 landraces of *japonica* (see information at [http://www.gene.affrc.go.jp/databases-core\\_collections\\_wr.php#note02\\_f](http://www.gene.affrc.go.jp/databases-core_collections_wr.php#note02_f)), and 34 accessions of *O.rufipogon* (**Table S2**). Accessions were sequenced at three *OsglHATI* sites—the promoter region, 50 kb upstream and 60 kb downstream of the gene body; nucleotide diversity per site was estimated for landrace groups and for *O. rufipogon* using DnaSP 5.1 (15). We conducted coalescent simulations with a two-population model of domestication as described in Gao & Innan (16), in which we assumed  $N_{rufipogon} = N_{sativa} = 125,000$ . To estimate the timing of the domestication event, we tested several values ( $T_{domestication} = \{7500, 9000, 10000, 12000\}$ ). Selfing rates of landraces and *O. rufipogon* were estimated, respectively, to be 95% and 60% in our simulation, with a recombination rate of 4 cM/Mb across the genome. Selection and bottleneck caused a reduction of genetic diversity in landraces. The severity of the bottleneck for the *indica* and *japonica* domestication process was estimated to be  $k_{indica} = 1.5$  and  $k_{japonica} = 0.9$  (16). To distinguish these two factors, based on a two-population model with bottleneck (as a neutral model), we collected 10,000 simulation replications. We tested whether the low nucleotide diversity observed in rice landraces could be explained by a population bottleneck alone because this would have caused a reduction in nucleotide diversity throughout the genome. Respective neutrality in these three sites was not rejected (**Table S2**).

**Fig. S1**

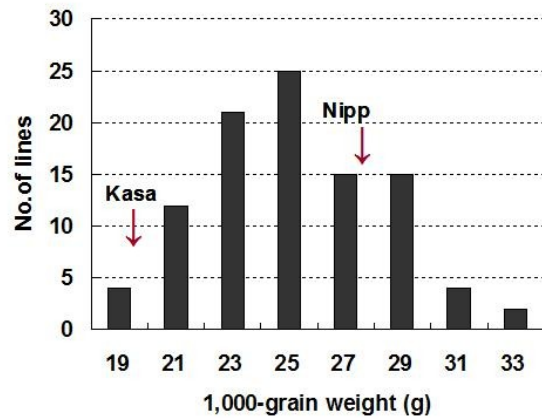

**Fig. S1.** Frequency distribution of grain weight in the BIL series derived from Nipp and Kasa. Arrows indicate the mean grain weight phenotype for two parents: Nipp and Kasa.

**Fig. S2**

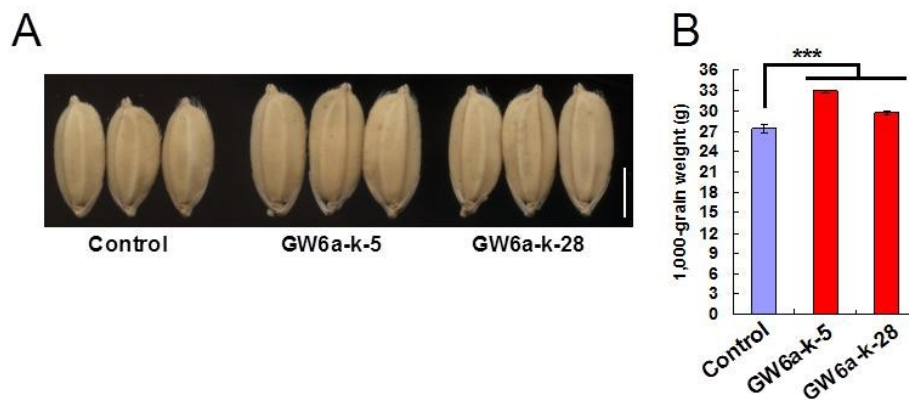

**Fig. S2.** Transgenic plants containing GW6a-k-5 and GW6a-k-28 sub-BAC clones bore larger (A) and significantly heavier grains (B) than the vector control (Control). \*\*\*,  $P < 0.001$ . Student's  $t$ -test was used to generate the  $P$  values. Data are the means  $\pm$  SD ( $n = 3$ ).



Fig. S3

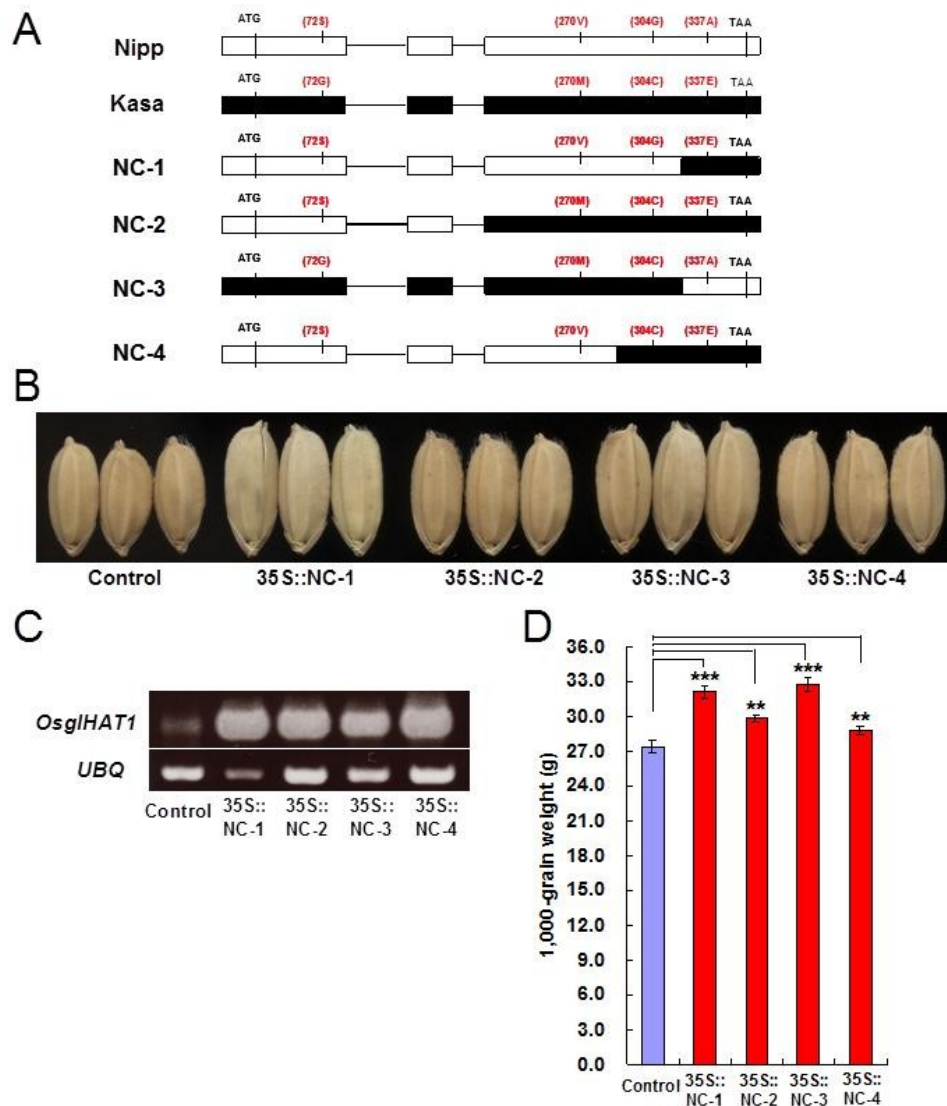

**Fig. S3.** Transgenic plants carrying amino acid-swapped *OsglHAT1* parental alleles (**A**) bore apparently larger (**B**) and significantly heavier grains (**D**) with increased *OsglHAT1* transcript expression as measured by RT-PCR (**C**). \*\*,  $P < 0.05$ ; \*\*\*,  $P < 0.001$ . Student's *t*-test was used to generate the *P* values. Data are the means  $\pm$  SD ( $n = 3$ ).

Fig. S4

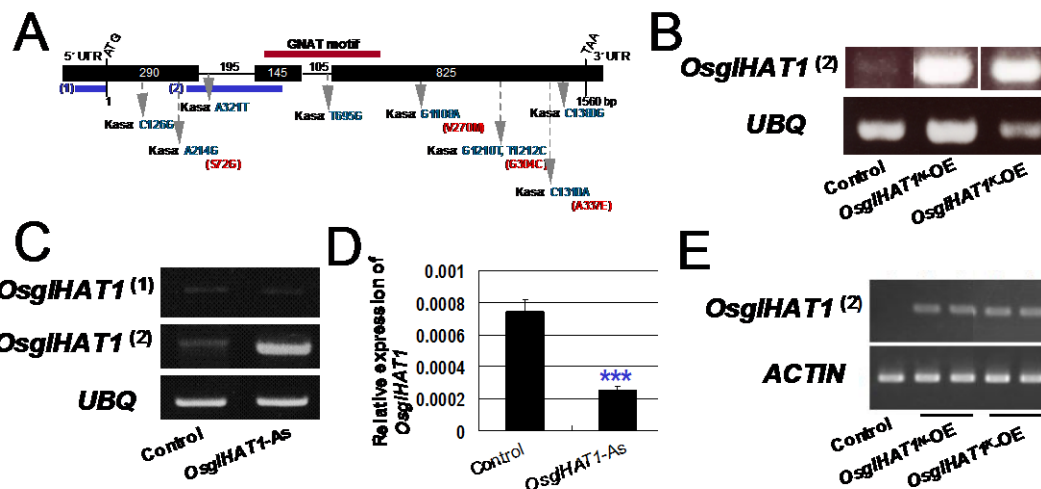

**Fig. S4.** Levels of *OsglHAT1* transcripts in the transgenic plants were probed. **(A)** Gene structure of *OsglHAT1* and relative PCR product locations (the numbered blue bars) for transcription analysis. **(B)** RT-PCR results showing that relative to the vector control, the expression of *OsglHAT1* transcripts was clearly elevated in rice plants containing the *OsglHAT1<sup>N</sup>*- and *OsglHAT1<sup>K</sup>*-OE transgenic constructs. **(C)** The enhanced exogenous expression of *OsglHAT1*<sup>(2)</sup> in the plant containing the *OsglHAT1<sup>N</sup>*-AS transgenic construct indicated a successful transgenic assay, while the endogenous level of *OsglHAT1* transcripts in the same plant was actually reduced, as revealed by the amplification of primer set *OsglHAT1*<sup>(1)</sup>. **(D)** The endogenous *OsglHAT1* transcription by qPCR analysis in the same *OsglHAT1-AS* transgenic plant as in **(C)** using primer set *OsglHAT1*<sup>(1)</sup> (see legend for **A**). RNA was isolated and quantitated by qPCR, normalized to ubiquitin. \*\*\*,  $P < 0.001$ . Student's  $t$ -test was used to generate the  $P$  values. Data are the means  $\pm$  SD ( $n = 3$ ). **(E)** The *OsglHAT1* transcript in *Arabidopsis* transgenic plants was clearly elevated.

Fig. S5

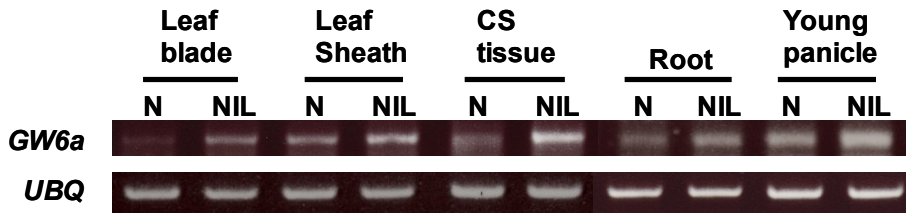

Fig. S5. The expression pattern of *OsglHAT1* was assayed using RT-PCR in the various organs and tissues indicated. N, Nipp; NIL, NIL(*OsglHAT1*); CS tissue, ~1cm-long culm tissue containing the shoot apical meristem.

Fig. S6

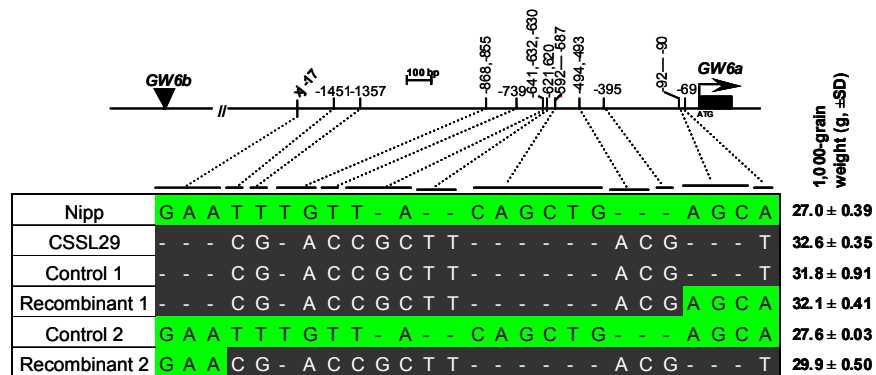

Fig. S6. A genotype map shows the altered SNPs of homozygous recombinants assayed by sequencing the genomic region between markers xj-17 and xj-20 with Nipp and CSSL29 as controls. Relative nucleotide distances from the translation start site (ATG) of the Nipp sequence are shown.

**Fig. S7**

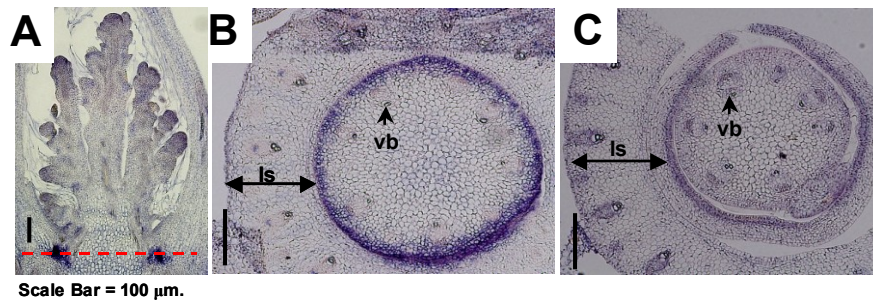

**Fig. S7.** The *OsgHAT1* mRNA is expressed in the basal part of the abaxial side of the bract shown by *in situ* hybridization of longitudinal (**A**) and transverse (**B**) sections compared to a negative control using a sense probe made from the *OsgHAT1* gene (**C**). ls, leaf sheath; vb, vascular bundle.

**Fig. S8**

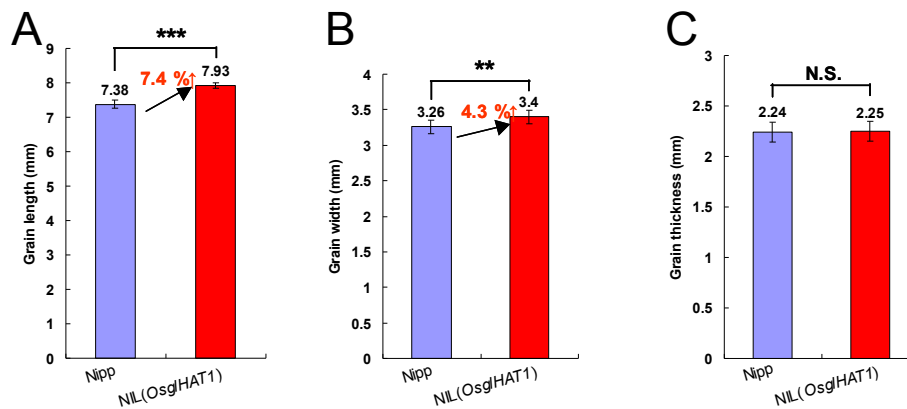

**Fig. S8.** Comparisons of grain shape components, including grain length (**A**), width (**B**), and thickness (**C**), in Nipp and NIL(*OsgHAT1*) plants. \*\*,  $P < 0.05$ ; \*\*\*,  $P < 0.001$ ; N.S., not significant. Student's *t*-test was used to generate the  $P$  values. Data are the means  $\pm$  SD ( $n = 3$ ).

**Fig. S9**

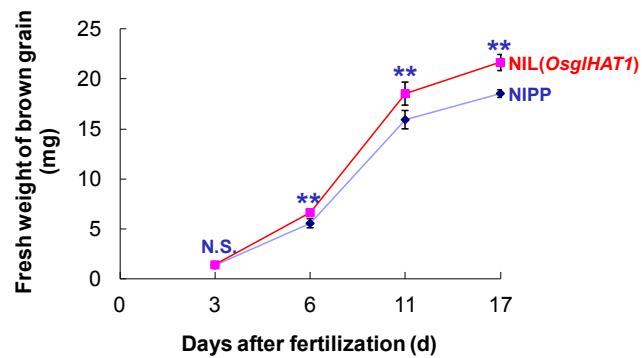

**Fig. S9.** Characterization of grain milk filling in Nipp and NIL(*Osg/HAT1*) revealed the time course of the fresh weight increase of brown grains. Data are the means  $\pm$  SD ( $n = \sim 3$  to 5 plants). \*\*,  $P < 0.05$ ; N.S., not significant. Student's *t*-test was used to generate the *P* values.

Fig. S10

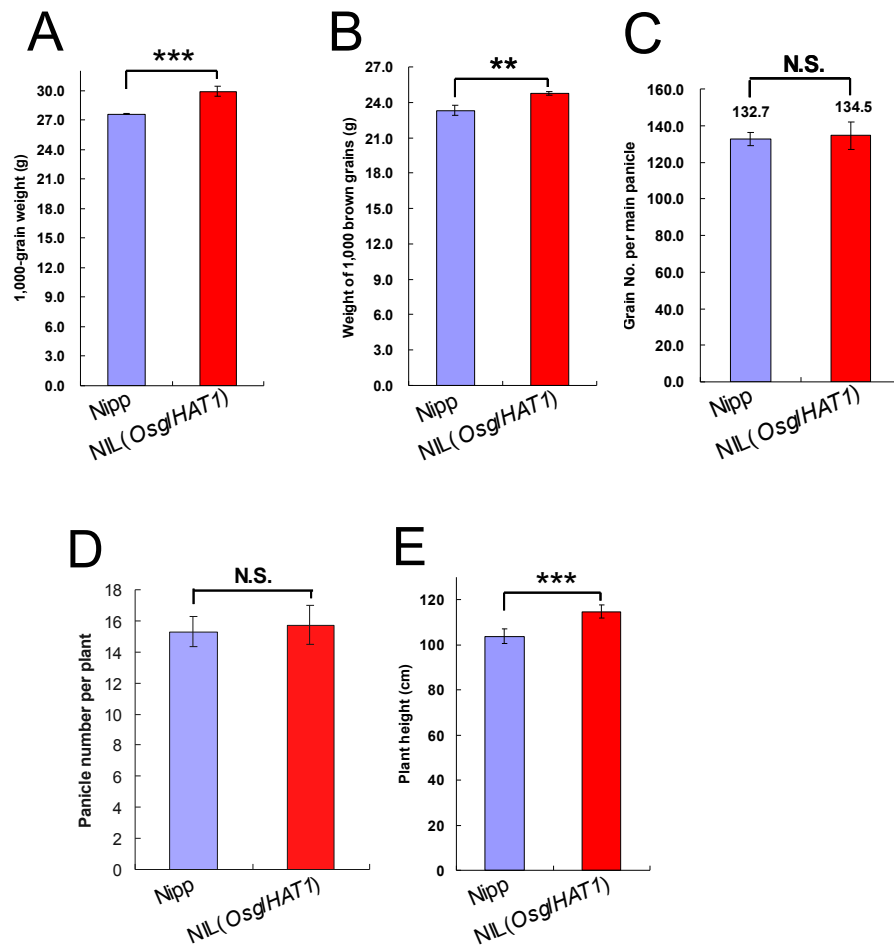

**Fig. S10.** Comparisons of agronomic traits between Nipp and NIL(*Osg/HAT1*), including mean weight of 1,000 grains (**A**), mean weight of 1,000 brown grain (**B**), mean grain number per panicle (**C**), mean panicle number per plant (**D**), and mean plant height (**E**). \*\*,  $P < 0.05$ ; \*\*\*,  $P < 0.001$ ; N.S., not significant. Student's *t*-test was used to generate the *P* values. Data are the means  $\pm$  SD ( $n > 20$  plants).

**Fig. S11**

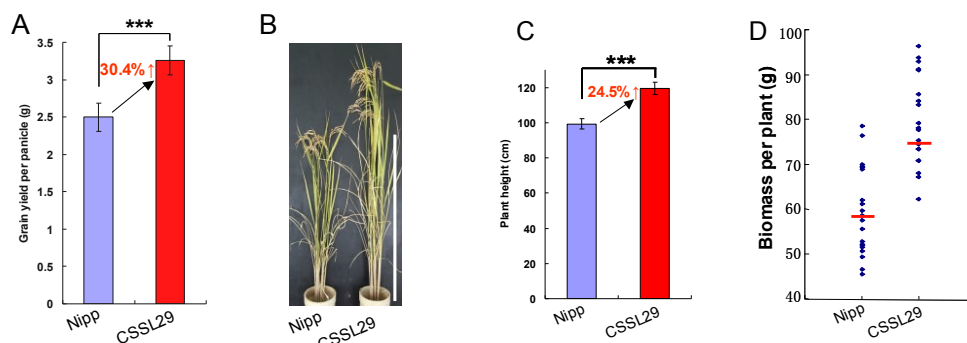

**Fig. S11.** *GW6* contributes to both grain yield and plant biomass. Comparison of grain yields per panicle (**A**). The plant phenotype of Nipp and CSSL29 (**B**), and accordingly, the quantification of plant height (**C**) and biomass per plant (**D**). \*\*\*,  $P < 0.001$ ; N.S., not significant. Student's  $t$ -test was used to generate the  $P$  values. Data are the means  $\pm$  SD ( $n > 20$  plants).

**Fig. S12**

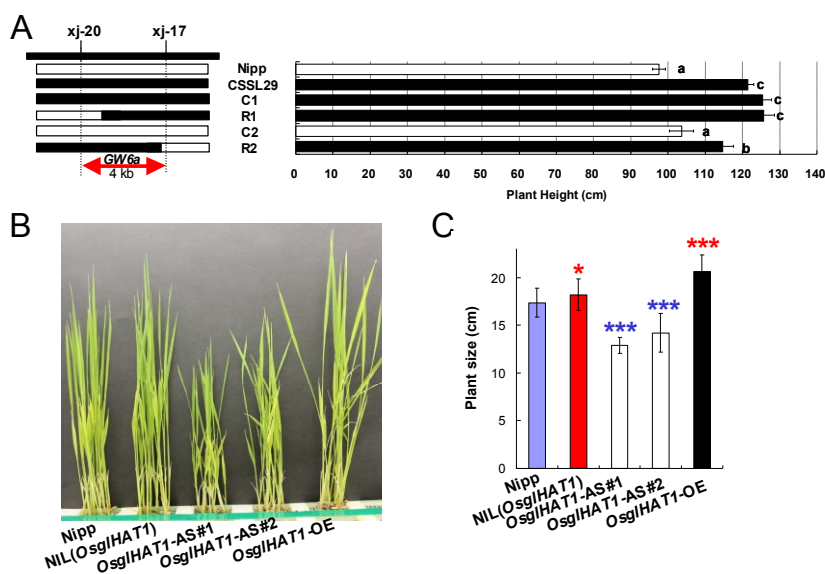

**Fig. S12.** *OsglHAT1* modulates plant height and vegetative growth. (**A**) Genetic evidence showing that the 4-kb region of *GW6a* is also responsible for plant height. (**B**) The early seedling stage phenotypes. (**C**) Quantification of the height of the plants shown in **B**. \*,  $P < 0.1$ ; \*\*\*,  $P < 0.001$ . Student's  $t$ -test was used to generate the  $P$  values. Data are the means  $\pm$  SD ( $n > 15$  plants).

**Fig. S13**

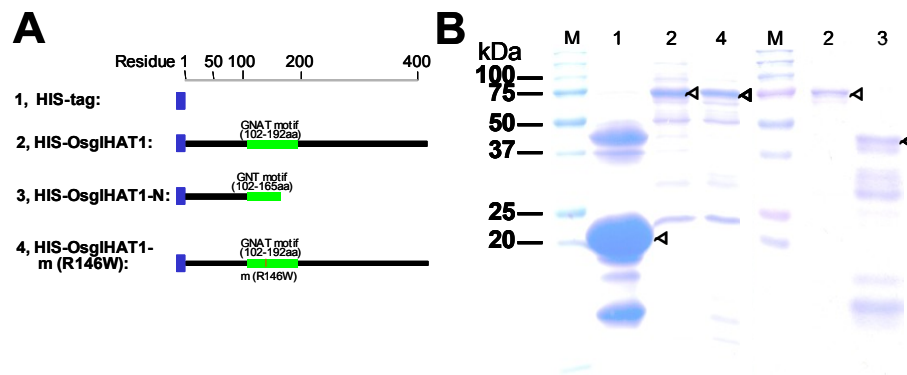

**Fig. S13.** Purification of the GNAT motif fragment of OsgIHAT1. **(A)** Schematic of HIS-tag, the OsgIHAT1 protein and derivatives for expression and purification from *E. coli* cells and for histone acetyltransferase activity assays. **(B)** SDS-PAGE analysis of the purified OsgIHAT1 proteins from *E. coli* cells. Arrowheads indicate HIS-OsgIHAT1 fusion proteins or HIS-tag alone.



**Fig. S14**

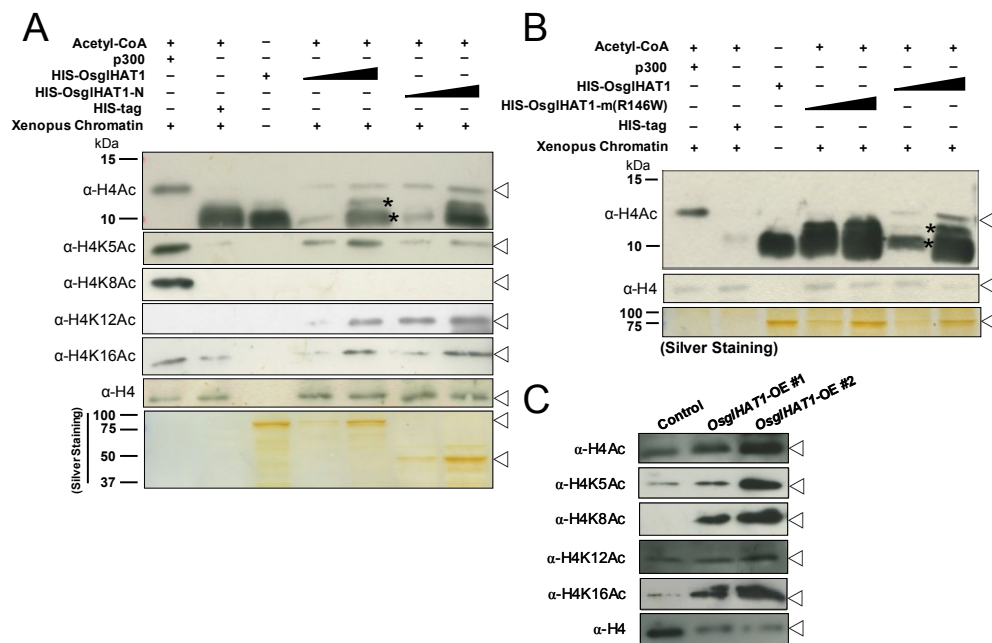

**Fig. S14.** OsglHAT1 is a histone H4 acetyltransferase. *(A)* *in vitro* HAT assay of OsglHAT1 proteins towards chromatin histone H4. Acetylation was detected by Western blot analysis using an antibody against acetylated histone H4 (H4Ac) or specific acetylation sites in the histone H4 N-terminal tail indicated on the left. *(B)* The R146W mutation of OsglHAT1 protein abolished its ability to acetylating chromatin histone H4 *in vitro* HAT assays. *(C)* The *in vivo* substrate specificity of OsglHAT1. Specific antibodies in Western blot analysis are indicated on the left. Asterisks in *A* and *B* denote nonspecific bands.

**Fig. S15**

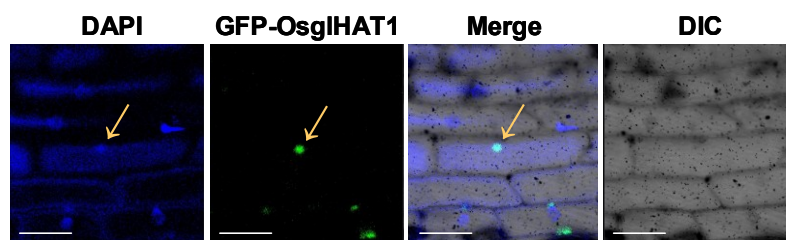

**Fig. S15.** GFP-OsglHAT1 was localized to the nucleus. DAPI staining indicates the nucleus of the onion epidermal cell. Scale bars: 100  $\mu$ m.

Fig. S16

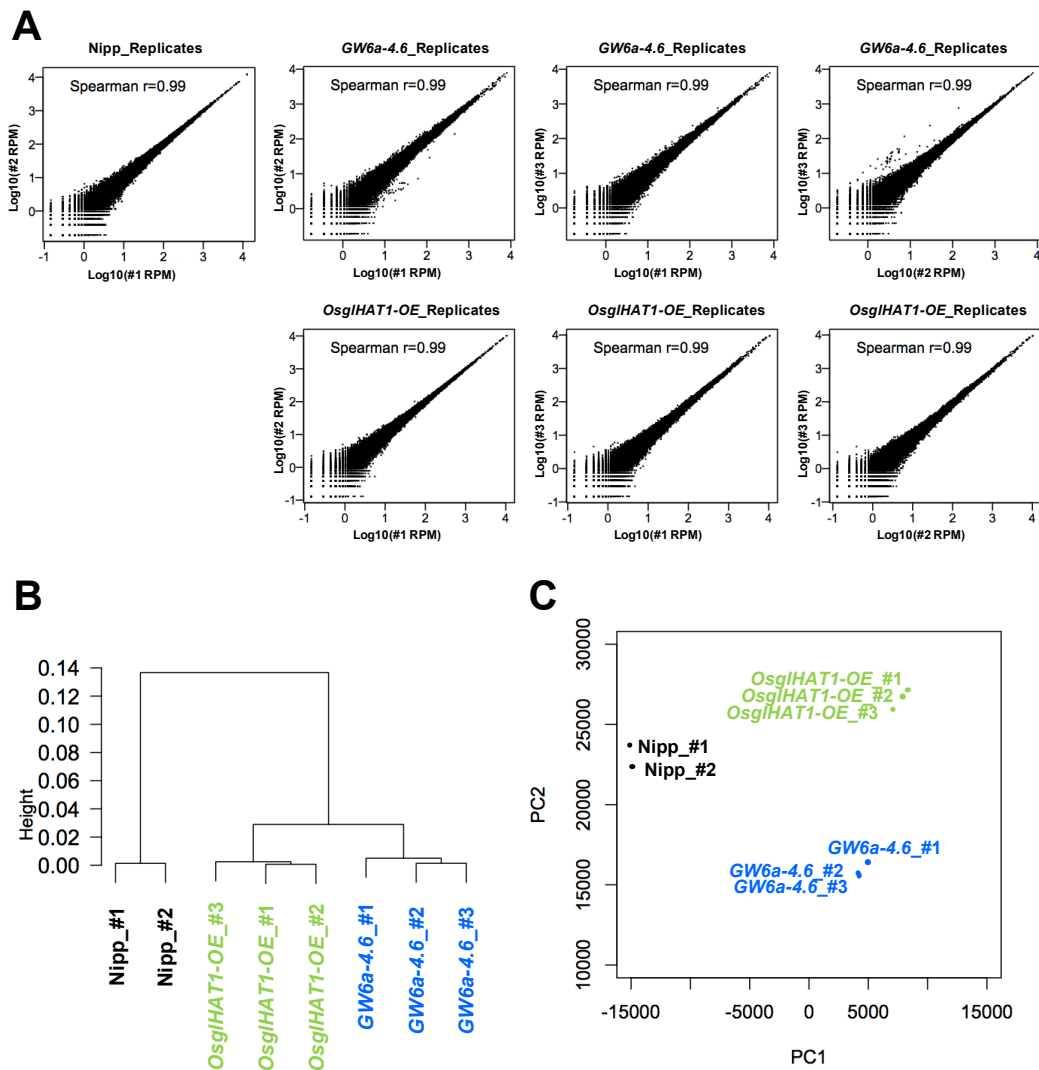

**Fig. S16.** Biological replicates of RNA-seq results are highly reproducible. (A) Correlation of RNA-seq from replicates in the wild type Nipp, GW6a-4.6 and *OsgIHAT1*-OE samples. (B) Hierarchical clustering of all samples from the wild type Nipp, GW6a-4.6 and *OsgIHAT1*-OE. (C) Principal component analysis of all samples from the wild type Nipp, GW6a-4.6 and *OsgIHAT1*-OE.

**Fig. S17**

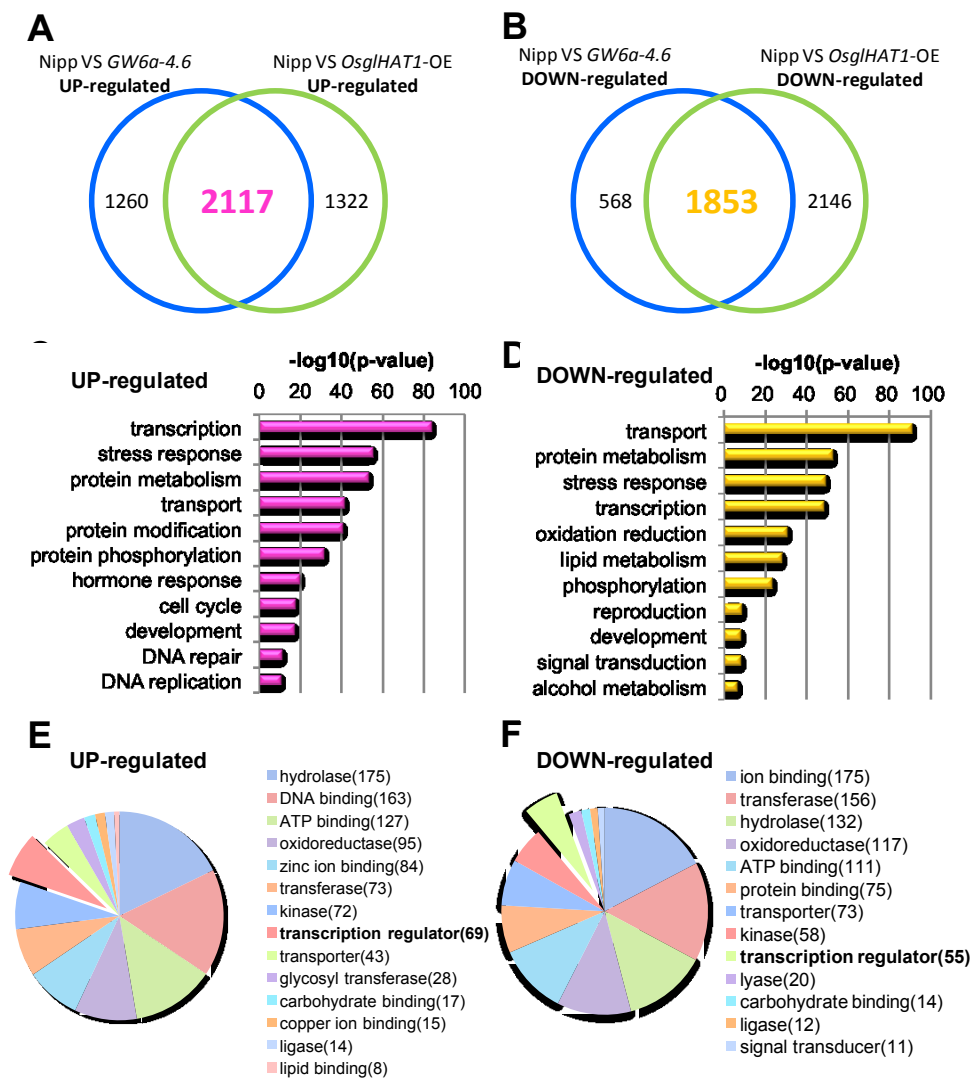

**Fig. S17.** RNA-seq analysis shows that changed *OsglHAT1* expression in transgenic plants alters transcription of a wide variety of biological processes and molecular functions. Venn diagram shows the numbers of up-regulated (**A**) and down-regulated genes (**B**).

Significantly enriched GO terms show representative biological processes of up-regulated (**C**) and down-regulated genes (**D**). Significantly enriched GO -terms of representative molecular function categories of up-regulated (**E**) and down-regulated genes (**F**) identified in **A** and **B**, respectively.

**Fig. S18**

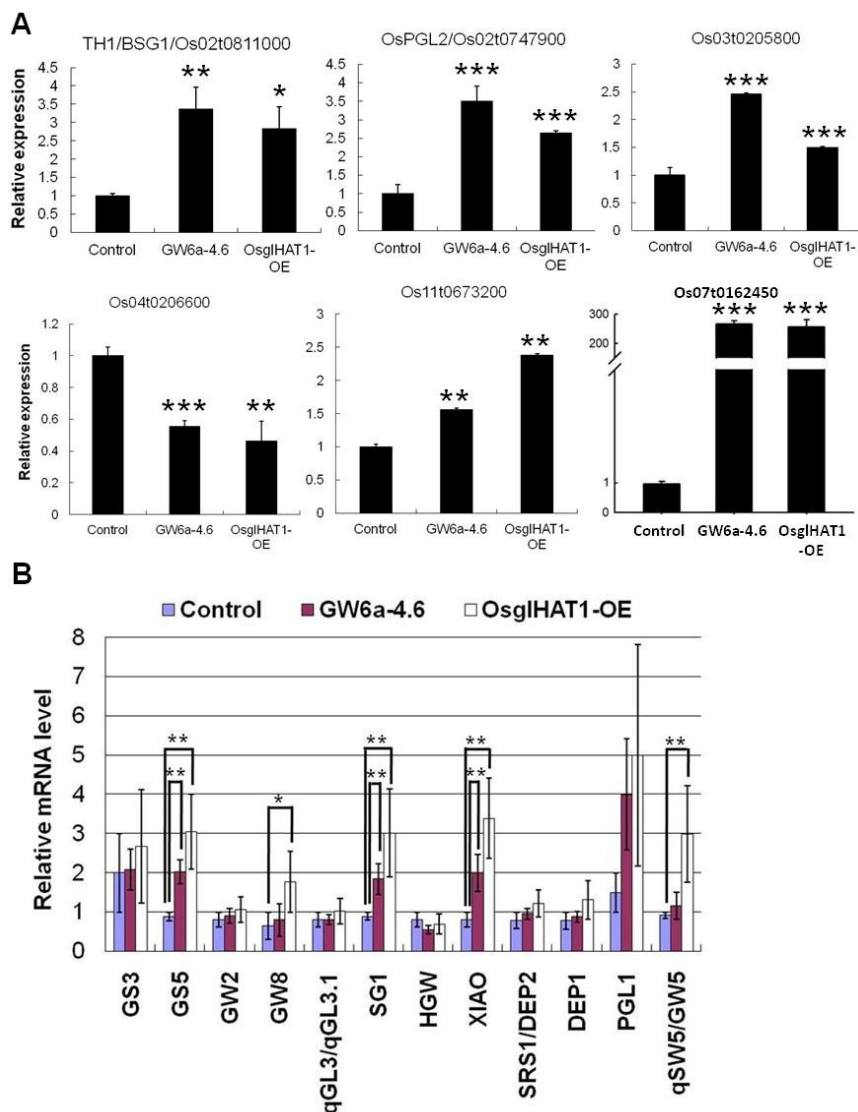

**Fig. S18.** qPCR analysis of indicated gene expressions (A). RNA was isolated from the indicated young panicle tissues, and these RNAs quantitated by qPCR, normalized to *ACTIN*. \*,  $P < 0.01$ ; \*\*,  $P < 0.001$ . Student's *t*-test was used to generate the *P* values. Graph shows comparisons of read counting among the control, *GW6a-4.6*, and *OsglHAT1*-OE genotypes in the RNA-seq experiments (B). \*,  $P < 0.01$ ; \*\*,  $P < 0.001$ . We used EdgeR with TbT normalization to find differentially expressed genes and calculate FDR values as described in the **Materials and Methods**.

**Fig. S19**

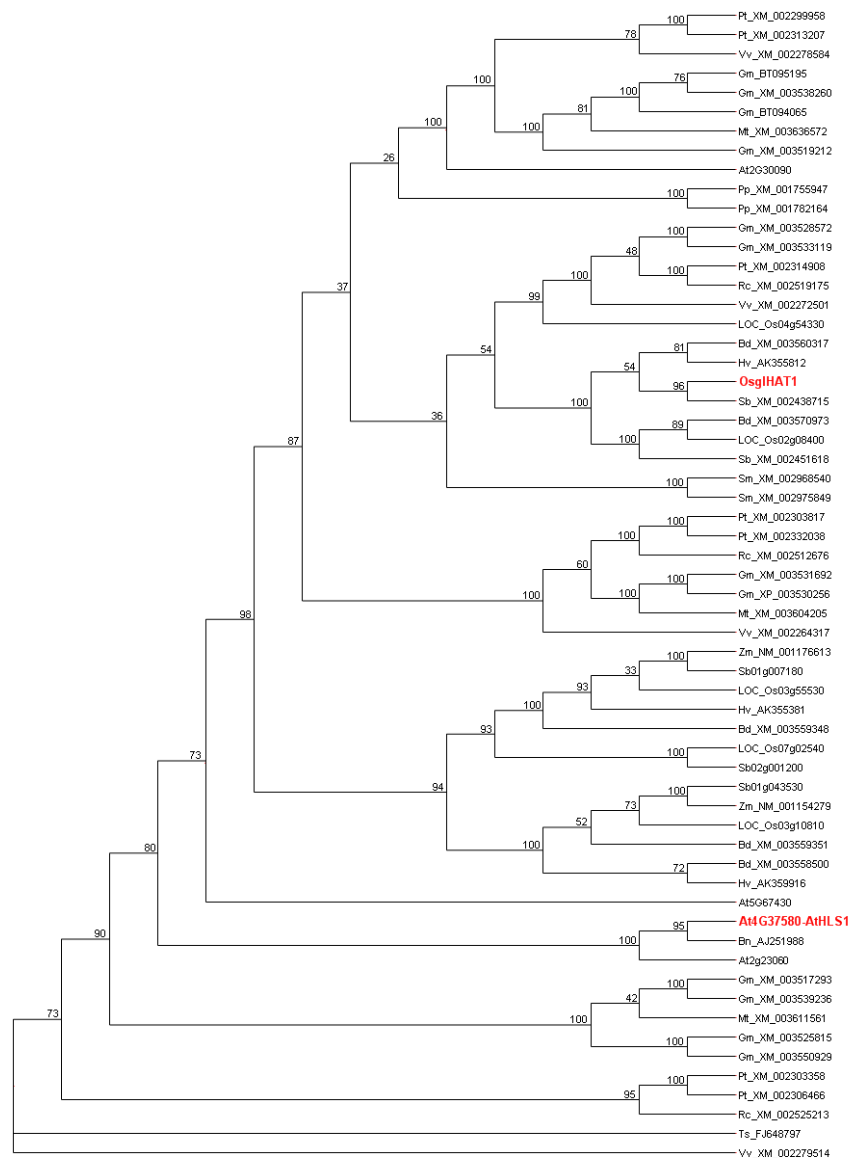

**Fig. S19.** A phylogenetic view of putative *OsgIHAT1* homologs. Fifty-nine *OsgIHAT1* homologs were obtained from database searches. At, *Arabidopsis thaliana*; Bd, *Brachypodium distachyon*; Bn, *Brassica napus*; Gm, *Glycine max*; Hv, *Hordeum vulgare*; Mt, *Medicago truncatula*; Pp, *Physcomitrella patens*; Pt, *Populus trichocarpa*; Rc, *Ricinus communis*; Sb, *Sorghum bicolor*; Sm, *Selaginella moellendorffii*; Ts, *Turnera subulata*; Vv, *Vitis vinifera*; Zm, *Zea mays*.

**Table S1**

| <b>Primer sets used in this study</b> |                                                             |                             |                               |
|---------------------------------------|-------------------------------------------------------------|-----------------------------|-------------------------------|
| <b>Primer/<br/>gene name</b>          | <b>Forward (5'-3')</b>                                      | <b>Reverse (5'-3')</b>      | <b>Primer type<br/>/usage</b> |
| xj112                                 | CAC TAA TCA AGC CAC TTC GG                                  | CGA AAC TTG TTT TCC TTC CC  | SSR                           |
| xj113                                 | AGG AAA ACC GTA GCG TAG AC                                  | GGC TTT CAG CAA TTC ACT GG  | SSR                           |
| xj-14                                 | GTG AGG GTG TTG ACG ATT TTC                                 | TCC GTT TCC TTA TAG GTT TTG | STS                           |
| xj-6                                  | AGC CAA GAA GCA AGA ACT CA                                  | ACC TCA ACC TGT CGC TCA A   | STS                           |
| xj-11                                 | AGA TAG CTT TAC GGC CTG TT                                  | CAT CGG ATA TGC GGA CAC     | STS                           |
| xj-20-5                               | ATA GAG TAT CAT TCC GTT GG                                  | GAG TGG CTC CAT TTC TTG     | STS                           |
| xj-19-7                               | TCT GTT GGC AGC ACG ATT TG                                  | CTG TGA ATG CGG CTG TTT GC  | STS                           |
| xj-5769                               | ACT GGC AGG ATG AGT GGT A                                   | GGG CCG TTG ATA GTA AAG AT  | STS                           |
| xj-7                                  | AGG TGG GGC ATG TCG GTG                                     | CGG AAG GCG CAG CAG AGT     | STS                           |
| xj-16a                                | TGG ACA CGA ATG AAA AGG                                     | ATA CAG AGA GAG GGG GGA     | STS                           |
| xj-20                                 | ATC ATT GCC ACC GAT GCT                                     | TTG ACC GGC CAA ATC ACT     | CAPS/TaqI                     |
| xj-17                                 | ATG TTC GTT CTG GTC TTG                                     | CTG TCC TCT TTT TTC TTC     | STS                           |
| <i>OsglHAT1</i>                       | ATG GTG GAG ACG ACG ACG ATG                                 | TTA GAA CTC GCG GGG GTC G   | ORF<br>cloning                |
| UBQ                                   | GA CGGA CGCA CCCTGGCTGACTAC                                 | TGCTGCCAATTACCATATACCA CGAC | RT-(q)PCR                     |
| <i>OsglHAT1</i> <sup>(1)</sup>        | CGT GTA TAA ATG CGC CAC AC                                  | GGC CGA TCT CAC CAG CTA C   | qPCR                          |
| <i>OsglHAT1</i> <sup>(2)</sup>        | GAA GGC GAG CAT GTCTCT CTG CG GGC GAC CTT CAC GAA TGG CTT C |                             | RT-(q)PCR                     |
| <i>pOsglHAT1</i>                      | GctctagG GCC GAT CTC ACC AGC TAC                            | ACGCgtcgacCGCTGCCAATTCATTAC | promoter<br>cloning           |
| Up-50K                                | ATTATGGCACCGGAGTGGTT                                        | GAGCAGGCTAGGACATGGGT        | Domestication<br>analysis     |
| Down-60K                              | GGAAAATGATCCGGCAAG                                          | GCCCGCAAGGAAAGAAAT          | Domestication<br>analysis     |
| ACTIN                                 | GTT GGG ATG AAC CAGAAG GA                                   | GAA CCA CCG ATC CAG ACA CT  | RT-PCR                        |
|                                       | GCT GTT CAC GGG GAG GTT                                     | TGA GGT TCT TGA TGC ACC AG  | in situ<br>hybridization      |
| R146W                                 | GGT GTC GCC ATC TCA CTG GCG GCT GGG GAT CGG G               |                             | Making of construct of        |
|                                       | CCC GAT CCC CAG CCG CCA GTG AGA TGG CGA CAC C               |                             | <i>OsglHAT1</i> -m (R146W)    |

**Table S2**

Sequence diversity in *Oryza sativa* and *rufipogon* around *OsglHAT1* region and results of the tests of selection.

| Gene/region | <i>Oryza rufipogon</i> |          |          |          |         |          | <i>Oryza sativa</i> spp. <i>indica</i> |          |          |          |          |         | Coalescent Simulation<br><i>rufipogon</i> VS<br><i>indica</i> | <i>Oryza sativa</i> spp. <i>japonica</i> |                   |          |          |          |          | Coalescent Simulation<br><i>rufipogon</i> VS<br><i>japonica</i> |         |           |                   |
|-------------|------------------------|----------|----------|----------|---------|----------|----------------------------------------|----------|----------|----------|----------|---------|---------------------------------------------------------------|------------------------------------------|-------------------|----------|----------|----------|----------|-----------------------------------------------------------------|---------|-----------|-------------------|
|             | <i>N</i>               | <i>L</i> | <i>S</i> | <i>h</i> | $\pi$   | $\theta$ | <i>Tajima's D</i>                      | <i>N</i> | <i>L</i> | <i>S</i> | <i>h</i> | $\pi$   |                                                               | $\theta$                                 | <i>Tajima's D</i> | <i>N</i> | <i>L</i> | <i>S</i> | <i>h</i> |                                                                 | $\pi$   | $\theta$  | <i>Tajima's D</i> |
| up-stream   | 34                     | 620      | 40       | 22       | 0.01012 | 0.01578  | -1.29410                               | 50       | 622      | 14       | 5        | 0.00570 | 0.00538                                                       | 0.17771                                  | <i>P</i> > 0.51   | 14       | 659      | 7        | 2        | 0.00152                                                         | 0.00334 | -2.01359* | <i>P</i> > 0.34   |
| promoter    | 34                     | 619      | 8        | 8        | 0.00230 | 0.00316  | -0.80339                               | 50       | 623      | 6        | 5        | 0.00262 | 0.00215                                                       | 0.55712                                  | <i>P</i> > 0.90   | 14       | 623      | 1        | 2        | 0.00023                                                         | 0.00050 | -1.15524  | <i>P</i> > 0.21   |
| down-stream | 34                     | 520      | 8        | 7        | 0.00424 | 0.00376  | 0.37493                                | 50       | 520      | 6        | 5        | 0.00224 | 0.00258                                                       | -0.33344                                 | <i>P</i> > 0.47   | 14       | 520      | 1        | 2        | 0.00085                                                         | 0.00060 | 0.84228   | <i>P</i> > 0.40   |

*N*, number of sampled sequences; *L*, length of the core alignments in which all sequences contain bases, excluding gaps; *S*, total number of segregating sites; *h*, number of unique sequences (haplotypes);  $\pi$ , average proportion of pairwise differences per base pair at all sites (17);  $\theta$ , a function of both the number of polymorphic sites and the number of sampled sequences at all sites (18); *Tajima's D*, statistics of neutrality at all sites (19). \*, *P* < 0.05.

Table S3

Table S3. *pOsg/HATI* alleles and the nucleotide polymorphisms in a set of 50 *Oryza sativa* ssp. *indica* cultivars, 14 *Oryza sativa* ssp. *japonica* cultivars, and 34 *Oryza rufipogon* accessions.

| Accession name              | Accession no. | Origin      | Group                                  | Position in <i>pOsg/HATI</i> sequence |    |    |    |    |    |     |     |         |     | <i>pGNAT</i> -type |     |     |     |   |   |   |                      |
|-----------------------------|---------------|-------------|----------------------------------------|---------------------------------------|----|----|----|----|----|-----|-----|---------|-----|--------------------|-----|-----|-----|---|---|---|----------------------|
|                             |               |             |                                        | 6                                     | 11 | 22 | 27 | 49 | 54 | 134 | 143 | 293-296 | 403 |                    | 407 | 450 | 510 |   |   |   |                      |
| Kasalath                    | WRC 02        | India       | <i>Oryza sativa</i> ssp. <i>indica</i> | T                                     | T  | T  | G  | G  | G  | C   | C   | G       | G   | C                  | C   | C   | C   | C | C | G | Kasalath-type allele |
| ARC 5955                    | WRC 35        | India       | <i>Oryza sativa</i> ssp. <i>indica</i> | T                                     | T  | T  | G  | G  | G  | C   | C   | C       | T   | C                  | C   | C   | C   | C | C | G | Kasalath-type allele |
| Badari Dhan                 | WRC 39        | Nepal       | <i>Oryza sativa</i> ssp. <i>indica</i> | T                                     | T  | T  | G  | G  | G  | C   | C   | C       | T   | C                  | C   | C   | C   | C | C | G | Kasalath-type allele |
| Nepal 555                   | WRC 40        | India       | <i>Oryza sativa</i> ssp. <i>indica</i> | T                                     | T  | T  | G  | G  | G  | C   | C   | C       | T   | C                  | C   | C   | C   | C | C | G | Kasalath-type allele |
| Jena 035                    | WRC 04        | Nepal       | <i>Oryza sativa</i> ssp. <i>indica</i> | T                                     | T  | T  | G  | G  | G  | C   | C   | C       | T   | C                  | C   | C   | C   | C | C | G | Kasalath-type allele |
| ARC 7291                    | WRC 34        | India       | <i>Oryza sativa</i> ssp. <i>indica</i> | T                                     | T  | T  | G  | G  | G  | C   | C   | C       | T   | C                  | C   | C   | C   | C | C | G | Kasalath-type allele |
| Shoni                       | WRC 31        | Bangladesh  | <i>Oryza sativa</i> ssp. <i>indica</i> | T                                     | T  | T  | G  | G  | G  | C   | C   | C       | T   | C                  | C   | C   | C   | C | C | G | Kasalath-type allele |
| Tupa 121-3                  | WRC 32        | Bangladesh  | <i>Oryza sativa</i> ssp. <i>indica</i> | T                                     | T  | T  | G  | G  | G  | C   | C   | C       | T   | C                  | C   | C   | C   | C | C | G | Kasalath-type allele |
| Ratul                       | WRC 36        | India       | <i>Oryza sativa</i> ssp. <i>indica</i> | T                                     | T  | T  | G  | G  | G  | C   | C   | C       | T   | C                  | C   | C   | C   | C | C | G | Kasalath-type allele |
| ARC 7047                    | WRC 37        | India       | <i>Oryza sativa</i> ssp. <i>indica</i> | T                                     | T  | T  | G  | G  | G  | C   | C   | C       | T   | C                  | C   | C   | C   | C | C | G | Kasalath-type allele |
| ARC 11094                   | WRC 38        | India       | <i>Oryza sativa</i> ssp. <i>indica</i> | T                                     | T  | T  | G  | G  | G  | C   | C   | C       | T   | C                  | C   | C   | C   | C | C | G | Kasalath-type allele |
| Muha                        | WRC 25        | Indonesia   | <i>Oryza sativa</i> ssp. <i>indica</i> | T                                     | T  | T  | G  | G  | G  | C   | C   | C       | T   | C                  | C   | C   | C   | C | C | G | Kasalath-type allele |
| Jhona 2                     | WRC 27        | India       | <i>Oryza sativa</i> ssp. <i>indica</i> | T                                     | T  | T  | G  | G  | G  | C   | C   | C       | T   | C                  | C   | C   | C   | C | C | G | Kasalath-type allele |
| Nepal 8                     | WRC 26        | Nepal       | <i>Oryza sativa</i> ssp. <i>indica</i> | T                                     | T  | T  | G  | G  | G  | C   | C   | C       | T   | C                  | C   | C   | C   | C | C | G | Kasalath-type allele |
| Nepal 8                     | WRC 27        | Nepal       | <i>Oryza sativa</i> ssp. <i>indica</i> | T                                     | T  | T  | G  | G  | G  | C   | C   | C       | T   | C                  | C   | C   | C   | C | C | G | Kasalath-type allele |
| Surjamukhi                  | WRC 33        | Nepal       | <i>Oryza sativa</i> ssp. <i>indica</i> | T                                     | T  | T  | G  | G  | G  | C   | C   | C       | T   | C                  | C   | C   | C   | C | C | G | Kasalath-type allele |
| Jarjan                      | WRC 28        | Bhutan      | <i>Oryza sativa</i> ssp. <i>indica</i> | T                                     | T  | T  | G  | G  | G  | C   | C   | C       | T   | C                  | C   | C   | C   | C | C | G | Kasalath-type allele |
| Kalo Dhan                   | WRC 29        | Nepal       | <i>Oryza sativa</i> ssp. <i>indica</i> | T                                     | T  | T  | G  | G  | G  | C   | C   | C       | T   | C                  | C   | C   | C   | C | C | G | Kasalath-type allele |
| Anjana Dhan                 | WRC 30        | Nepal       | <i>Oryza sativa</i> ssp. <i>indica</i> | T                                     | T  | T  | G  | G  | G  | C   | C   | C       | T   | C                  | C   | C   | C   | C | C | G | Kasalath-type allele |
| Local Basmati               | WRC 42        | India       | <i>Oryza sativa</i> ssp. <i>indica</i> | T                                     | T  | T  | G  | G  | G  | C   | C   | C       | T   | C                  | C   | C   | C   | C | C | G | Kasalath-type allele |
| Kaluheanati                 | WRC 41        | Sri Lanka   | <i>Oryza sativa</i> ssp. <i>indica</i> | T                                     | T  | T  | G  | G  | G  | C   | C   | C       | T   | C                  | C   | C   | C   | C | C | G | Kasalath-type allele |
| Neang Menh                  | WRC 58        | Cambodia    | <i>Oryza sativa</i> ssp. <i>indica</i> | T                                     | T  | T  | G  | G  | G  | C   | C   | C       | T   | C                  | C   | C   | C   | C | C | G | Kasalath-type allele |
| Naba                        | WRC 05        | India       | <i>Oryza sativa</i> ssp. <i>indica</i> | T                                     | T  | T  | G  | G  | G  | C   | C   | C       | T   | C                  | C   | C   | C   | C | C | G | Kasalath-type allele |
| Hakphaynhay                 | WRC 60        | Laos        | <i>Oryza sativa</i> ssp. <i>indica</i> | T                                     | T  | T  | G  | G  | G  | C   | C   | C       | T   | C                  | C   | C   | C   | C | C | G | Kasalath-type allele |
| Radin Goi Sesat             | WRC 61        | Malaysia    | <i>Oryza sativa</i> ssp. <i>indica</i> | T                                     | T  | T  | G  | G  | G  | C   | C   | C       | T   | C                  | C   | C   | C   | C | C | G | Kasalath-type allele |
| Kemasin                     | WRC 62        | Malaysia    | <i>Oryza sativa</i> ssp. <i>indica</i> | T                                     | T  | T  | G  | G  | G  | C   | C   | C       | T   | C                  | C   | C   | C   | C | C | G | Kasalath-type allele |
| Puluik Arang                | WRC 06        | Indonesia   | <i>Oryza sativa</i> ssp. <i>indica</i> | T                                     | T  | T  | G  | G  | G  | C   | C   | C       | T   | C                  | C   | C   | C   | C | C | G | Kasalath-type allele |
| Bleyo                       | WRC 63        | Indonesia   | <i>Oryza sativa</i> ssp. <i>indica</i> | T                                     | T  | T  | G  | G  | G  | C   | C   | C       | T   | C                  | C   | C   | C   | C | C | G | Kasalath-type allele |
| Padi Kuning                 | WRC 64        | Indonesia   | <i>Oryza sativa</i> ssp. <i>indica</i> | T                                     | T  | T  | G  | G  | G  | C   | C   | C       | T   | C                  | C   | C   | C   | C | C | G | Kasalath-type allele |
| Davao 1                     | WRC 07        | Philippines | <i>Oryza sativa</i> ssp. <i>indica</i> | T                                     | T  | T  | G  | G  | G  | C   | C   | C       | T   | C                  | C   | C   | C   | C | C | G | Kasalath-type allele |
| Ryuu Suisan Koumai          | WRC 09        | China       | <i>Oryza sativa</i> ssp. <i>indica</i> | T                                     | T  | T  | G  | G  | G  | C   | C   | C       | T   | C                  | C   | C   | C   | C | C | G | Kasalath-type allele |
| Shusoushu                   | WRC 10        | China       | <i>Oryza sativa</i> ssp. <i>indica</i> | T                                     | T  | T  | G  | G  | G  | C   | C   | C       | T   | C                  | C   | C   | C   | C | C | G | Kasalath-type allele |
| Keiboba                     | WRC 17        | China       | <i>Oryza sativa</i> ssp. <i>indica</i> | T                                     | T  | T  | G  | G  | G  | C   | C   | C       | T   | C                  | C   | C   | C   | C | C | G | Kasalath-type allele |
| Bingala                     | WRC 66        | Myanmar     | <i>Oryza sativa</i> ssp. <i>indica</i> | T                                     | T  | T  | G  | G  | G  | C   | C   | C       | T   | C                  | C   | C   | C   | C | C | G | Kasalath-type allele |
| Rambhog                     | WRC 65        | India       | <i>Oryza sativa</i> ssp. <i>indica</i> | T                                     | T  | T  | G  | G  | G  | C   | C   | C       | T   | C                  | C   | C   | C   | C | C | G | Kasalath-type allele |
| Asu                         | WRC 13        | Bhutan      | <i>Oryza sativa</i> ssp. <i>indica</i> | T                                     | T  | T  | G  | G  | G  | C   | C   | C       | T   | C                  | C   | C   | C   | C | C | G | Kasalath-type allele |
| Jinguyin                    | WRC 11        | China       | <i>Oryza sativa</i> ssp. <i>indica</i> | T                                     | T  | T  | G  | G  | G  | C   | C   | C       | T   | C                  | C   | C   | C   | C | C | G | Kasalath-type allele |
| Co 13                       | WRC 15        | China       | <i>Oryza sativa</i> ssp. <i>indica</i> | T                                     | T  | T  | G  | G  | G  | C   | C   | C       | T   | C                  | C   | C   | C   | C | C | G | Kasalath-type allele |
| Vary Futsi                  | WRC 16        | Madagascar  | <i>Oryza sativa</i> ssp. <i>indica</i> | T                                     | T  | T  | G  | G  | G  | C   | C   | C       | T   | C                  | C   | C   | C   | C | C | G | Kasalath-type allele |
| IR 58                       | WRC 14        | Philippines | <i>Oryza sativa</i> ssp. <i>indica</i> | T                                     | T  | T  | G  | G  | G  | C   | C   | C       | T   | C                  | C   | C   | C   | C | C | G | Kasalath-type allele |
| Milyang 23                  | WRC 57        | South Korea | <i>Oryza sativa</i> ssp. <i>indica</i> | T                                     | T  | T  | G  | G  | G  | C   | C   | C       | T   | C                  | C   | C   | C   | C | C | G | Kasalath-type allele |
| Qingyu (Seiyu)              | WRC 18        | Taiwan      | <i>Oryza sativa</i> ssp. <i>indica</i> | T                                     | T  | T  | G  | G  | G  | C   | C   | C       | T   | C                  | C   | C   | C   | C | C | G | Kasalath-type allele |
| Deng Pao Zhai (Toufutsusai) | WRC 19        | China       | <i>Oryza sativa</i> ssp. <i>indica</i> | T                                     | T  | T  | G  | G  | G  | C   | C   | C       | T   | C                  | C   | C   | C   | C | C | G | Kasalath-type allele |
| Tadukan                     | WRC 20        | Philippines | <i>Oryza sativa</i> ssp. <i>indica</i> | T                                     | T  | T  | G  | G  | G  | C   | C   | C       | T   | C                  | C   | C   | C   | C | C | G | Kasalath-type allele |
| Shwe Mang Gyi               | WRC 21        | Myanmar     | <i>Oryza sativa</i> ssp. <i>indica</i> | T                                     | T  | T  | G  | G  | G  | C   | C   | C       | T   | C                  | C   | C   | C   | C | C | G | Kasalath-type allele |
| Chin Galay                  | WRC 97        | Myanmar     | <i>Oryza sativa</i> ssp. <i>indica</i> | T                                     | T  | T  | G  | G  | G  | C   | C   | C       | T   | C                  | C   | C   | C   | C | C | G | Kasalath-type allele |
| Dejiaohualuo                | WRC 98        | China       | <i>Oryza sativa</i> ssp. <i>indica</i> | T                                     | T  | T  | G  | G  | G  | C   | C   | C       | T   | C                  | C   | C   | C   | C | C | G | Kasalath-type allele |
| Hong Cheuh Zai              | WRC 99        | China       | <i>Oryza sativa</i> ssp. <i>indica</i> | T                                     | T  | T  | G  | G  | G  | C   | C   | C       | T   | C                  | C   | C   | C   | C | C | G | Kasalath-type allele |
| Vandaran                    | WRC 100       | China       | <i>Oryza sativa</i> ssp. <i>indica</i> | T                                     | T  | T  | G  | G  | G  | C   | C   | C       | T   | C                  | C   | C   | C   | C | C | G | Kasalath-type allele |
| Basilanon                   | WRC 44        | China       | <i>Oryza sativa</i> ssp. <i>indica</i> | C                                     | T  | T  | G  | G  | G  | C   | C   | C       | T   | C                  | C   | C   | C   | C | C | G | Kasalath-type allele |



Table S3, continued.

| Accession name     | Accession no.      | Origin        | Group                                    | Position in <i>pOsgII/HAT1</i> sequence |    |    |    |    |    |     |     |     |     |     |     |     |     |   |   |   |   |   |   | <i>pGNAT</i> type |                      |
|--------------------|--------------------|---------------|------------------------------------------|-----------------------------------------|----|----|----|----|----|-----|-----|-----|-----|-----|-----|-----|-----|---|---|---|---|---|---|-------------------|----------------------|
|                    |                    |               |                                          | 6                                       | 11 | 22 | 27 | 49 | 54 | 134 | 143 | 293 | 296 | 403 | 407 | 450 | 510 |   |   |   |   |   |   |                   |                      |
| Kasalath           | WRC 02             | India         | <i>Oryza sativa</i> ssp. <i>indica</i>   | T                                       | T  | T  | G  | G  | C  | C   | C   | C   | C   | C   | C   | C   | C   | C | C | C | C | C | C | G                 | Kasalath-type allele |
| Dahonggu           | WRC 12             | China         | <i>Oryza sativa</i> ssp. <i>indica</i>   | T                                       | T  | G  | G  | G  | C  | C   | C   | C   | C   | C   | C   | C   | C   | C | C | C | C | C | C | G                 | Kasalath-type allele |
| W2265              | W2265              | Laos          | <i>Oryza rufipogon</i>                   | T                                       | T  | G  | G  | G  | C  | C   | C   | C   | C   | C   | C   | C   | C   | C | C | C | C | C | C | G                 | Kasalath-type allele |
| W2014              | W2014              | India         | <i>Oryza rufipogon</i>                   | T                                       | T  | G  | G  | G  | C  | C   | C   | C   | C   | C   | C   | C   | C   | C | C | C | C | C | C | G                 | Kasalath-type allele |
| AS067              | AS067              | Thailand      | <i>Oryza rufipogon</i>                   | T                                       | T  | G  | G  | G  | C  | C   | C   | C   | C   | C   | C   | C   | C   | C | C | C | C | C | C | G                 | Kasalath-type allele |
| W0106              | W0106              | India         | <i>Oryza rufipogon</i>                   | T                                       | T  | G  | G  | G  | C  | C   | C   | C   | C   | C   | C   | C   | C   | C | C | C | C | C | C | G                 | Kasalath-type allele |
| AS049              | AS049              | Sri Lanka     | <i>Oryza rufipogon</i>                   | T                                       | T  | G  | G  | G  | C  | C   | C   | C   | C   | C   | C   | C   | C   | C | C | C | C | C | C | G                 | Kasalath-type allele |
| AS052              | AS052              | Nepal         | <i>Oryza rufipogon</i>                   | T                                       | T  | G  | G  | G  | C  | C   | C   | C   | C   | C   | C   | C   | C   | C | C | C | C | C | C | G                 | Kasalath-type allele |
| AS081              | AS081              | Vietnam       | <i>Oryza rufipogon</i>                   | T                                       | T  | G  | G  | G  | C  | C   | C   | C   | C   | C   | C   | C   | C   | C | C | C | C | C | C | G                 | Kasalath-type allele |
| W0108              | W0108              | India         | <i>Oryza rufipogon</i>                   | T                                       | T  | G  | G  | G  | C  | C   | C   | C   | C   | C   | C   | C   | C   | C | C | C | C | C | C | G                 | Kasalath-type allele |
| IRGC105402         | IRGC105402         | China         | <i>Oryza rufipogon</i>                   | T                                       | T  | G  | G  | G  | C  | C   | C   | C   | C   | C   | C   | C   | C   | C | C | C | C | C | C | G                 | Kasalath-type allele |
| W1294              | W1294              | Philippines   | <i>Oryza rufipogon</i>                   | T                                       | T  | G  | G  | G  | C  | C   | C   | C   | C   | C   | C   | C   | C   | C | C | C | C | C | C | G                 | Kasalath-type allele |
| W1943              | W1943              | China         | <i>Oryza rufipogon</i>                   | T                                       | T  | G  | G  | G  | C  | C   | C   | C   | C   | C   | C   | C   | C   | C | C | C | C | C | C | G                 | Kasalath-type allele |
| AS085              | AS085              | China         | <i>Oryza rufipogon</i>                   | T                                       | T  | G  | G  | G  | C  | C   | C   | C   | C   | C   | C   | C   | C   | C | C | C | C | C | C | G                 | Kasalath-type allele |
| W1681              | W1681              | India         | <i>Oryza rufipogon</i>                   | T                                       | T  | G  | G  | G  | C  | C   | C   | C   | C   | C   | C   | C   | C   | C | C | C | C | C | C | G                 | Kasalath-type allele |
| W0593              | W0593              | Malaysia      | <i>Oryza rufipogon</i>                   | T                                       | T  | G  | G  | G  | C  | C   | C   | C   | C   | C   | C   | C   | C   | C | C | C | C | C | C | G                 | Kasalath-type allele |
| W1715              | W1715              | China         | <i>Oryza rufipogon</i>                   | T                                       | T  | G  | G  | G  | C  | C   | C   | C   | C   | C   | C   | C   | C   | C | C | C | C | C | C | G                 | Kasalath-type allele |
| W1865              | W1865              | Thailand      | <i>Oryza rufipogon</i>                   | T                                       | T  | G  | G  | G  | C  | C   | C   | C   | C   | C   | C   | C   | C   | C | C | C | C | C | C | G                 | Kasalath-type allele |
| W0137              | W0137              | India         | <i>Oryza rufipogon</i>                   | T                                       | T  | G  | G  | G  | C  | C   | C   | C   | C   | C   | C   | C   | C   | C | C | C | C | C | C | G                 | Kasalath-type allele |
| W1944              | W1944              | China         | <i>Oryza rufipogon</i>                   | T                                       | T  | G  | G  | G  | C  | C   | C   | C   | C   | C   | C   | C   | C   | C | C | C | C | C | C | G                 | Kasalath-type allele |
| W1685              | W1685              | India         | <i>Oryza rufipogon</i>                   | T                                       | T  | G  | G  | G  | C  | C   | C   | C   | C   | C   | C   | C   | C   | C | C | C | C | C | C | G                 | Kasalath-type allele |
| IRGC101508         | IRGC101508         | India         | <i>Oryza rufipogon</i>                   | T                                       | T  | G  | G  | G  | C  | C   | C   | C   | C   | C   | C   | C   | C   | C | C | C | C | C | C | G                 | Kasalath-type allele |
| AS062              | AS062              | Laos          | <i>Oryza rufipogon</i>                   | T                                       | T  | G  | G  | G  | C  | C   | C   | C   | C   | C   | C   | C   | C   | C | C | C | C | C | C | G                 | Kasalath-type allele |
| W2264              | W2264              | Vietnam       | <i>Oryza rufipogon</i>                   | T                                       | T  | G  | G  | G  | C  | C   | C   | C   | C   | C   | C   | C   | C   | C | C | C | C | C | C | G                 | Kasalath-type allele |
| W1551              | W1551              | Thailand      | <i>Oryza rufipogon</i>                   | T                                       | T  | G  | G  | G  | C  | C   | C   | C   | C   | C   | C   | C   | C   | C | C | C | C | C | C | G                 | Kasalath-type allele |
| W2003              | W2003              | India         | <i>Oryza rufipogon</i>                   | T                                       | T  | G  | G  | G  | C  | C   | C   | C   | C   | C   | C   | C   | C   | C | C | C | C | C | C | G                 | Kasalath-type allele |
| AS059              | AS059              | Bangladesh    | <i>Oryza rufipogon</i>                   | T                                       | T  | G  | G  | G  | C  | C   | C   | C   | C   | C   | C   | C   | C   | C | C | C | C | C | C | G                 | Kasalath-type allele |
| W1852              | W1852              | Thailand      | <i>Oryza rufipogon</i>                   | T                                       | T  | G  | G  | G  | C  | C   | C   | C   | C   | C   | C   | C   | C   | C | C | C | C | C | C | G                 | Kasalath-type allele |
| W1669              | W1669              | India         | <i>Oryza rufipogon</i>                   | T                                       | T  | G  | G  | G  | C  | C   | C   | C   | C   | C   | C   | C   | C   | C | C | C | C | C | C | G                 | Kasalath-type allele |
| AS051              | AS051              | Nepal         | <i>Oryza rufipogon</i>                   | T                                       | T  | G  | G  | G  | C  | C   | C   | C   | C   | C   | C   | C   | C   | C | C | C | C | C | C | G                 | Kasalath-type allele |
| W0574 (IRGC105491) | W0574 (IRGC105491) | Malaysia      | <i>Oryza rufipogon</i>                   | T                                       | T  | G  | G  | G  | C  | C   | C   | C   | C   | C   | C   | C   | C   | C | C | C | C | C | C | G                 | Kasalath-type allele |
| IRGC105908         | IRGC105908         | Thailand      | <i>Oryza rufipogon</i>                   | T                                       | T  | G  | G  | G  | C  | C   | C   | C   | C   | C   | C   | C   | C   | C | C | C | C | C | C | G                 | Kasalath-type allele |
| W1981              | W1981              | Indonesia     | <i>Oryza rufipogon</i>                   | T                                       | T  | G  | G  | G  | C  | C   | C   | C   | C   | C   | C   | C   | C   | C | C | C | C | C | C | G                 | Kasalath-type allele |
| W0107              | W0107              | India         | <i>Oryza rufipogon</i>                   | T                                       | T  | G  | G  | G  | C  | C   | C   | C   | C   | C   | C   | C   | C   | C | C | C | C | C | C | G                 | Kasalath-type allele |
| W2266              | W2266              | Laos          | <i>Oryza rufipogon</i>                   | T                                       | T  | G  | G  | G  | C  | C   | C   | C   | C   | C   | C   | C   | C   | C | C | C | C | C | C | G                 | Kasalath-type allele |
| W0610              | W0610              | Myanmar       | <i>Oryza rufipogon</i>                   | T                                       | T  | G  | G  | G  | C  | C   | C   | C   | C   | C   | C   | C   | C   | C | C | C | C | C | C | G                 | Kasalath-type allele |
| Tupa729            | WRC 55             | Bangladesh    | <i>Oryza sativa</i> ssp. <i>japonica</i> | T                                       | T  | G  | G  | G  | C  | C   | C   | C   | C   | C   | C   | C   | C   | C | C | C | C | C | C | G                 | Kasalath-type allele |
| Diaryu 1           | WRC 43             | China         | <i>Oryza sativa</i> ssp. <i>japonica</i> | T                                       | T  | G  | G  | G  | C  | C   | C   | C   | C   | C   | C   | C   | C   | C | C | C | C | C | C | G                 | Kasalath-type allele |
| Tima               | WRC 53             | Bhutan        | <i>Oryza sativa</i> ssp. <i>japonica</i> | T                                       | T  | G  | G  | G  | C  | C   | C   | C   | C   | C   | C   | C   | C   | C | C | C | C | C | C | G                 | Kasalath-type allele |
| Padi Parak         | WRC 49             | Indonesia     | <i>Oryza sativa</i> ssp. <i>japonica</i> | T                                       | T  | G  | G  | G  | C  | C   | C   | C   | C   | C   | C   | C   | C   | C | C | C | C | C | C | G                 | Kasalath-type allele |
| Phulba             | WRC 67             | India         | <i>Oryza sativa</i> ssp. <i>japonica</i> | T                                       | T  | G  | G  | G  | C  | C   | C   | C   | C   | C   | C   | C   | C   | C | C | C | C | C | C | G                 | Kasalath-type allele |
| Khau Mac Kho       | WRC 48             | Vietnam       | <i>Oryza sativa</i> ssp. <i>japonica</i> | T                                       | T  | G  | G  | G  | C  | C   | C   | C   | C   | C   | C   | C   | C   | C | C | C | C | C | C | G                 | Kasalath-type allele |
| Rexmont            | WRC 50             | United States | <i>Oryza sativa</i> ssp. <i>japonica</i> | T                                       | T  | G  | G  | G  | C  | C   | C   | C   | C   | C   | C   | C   | C   | C | C | C | C | C | C | G                 | Kasalath-type allele |
| Jaguary            | WRC 47             | Brazil        | <i>Oryza sativa</i> ssp. <i>japonica</i> | T                                       | T  | G  | G  | G  | C  | C   | C   | C   | C   | C   | C   | C   | C   | C | C | C | C | C | C | G                 | Kasalath-type allele |
| Ma sho             | WRC 45             | Myanmar       | <i>Oryza sativa</i> ssp. <i>japonica</i> | T                                       | T  | G  | G  | G  | C  | C   | C   | C   | C   | C   | C   | C   | C   | C | C | C | C | C | C | G                 | Kasalath-type allele |
| Khao Nok           | WRC 46             | Laos          | <i>Oryza sativa</i> ssp. <i>japonica</i> | T                                       | T  | G  | G  | G  | C  | C   | C   | C   | C   | C   | C   | C   | C   | C | C | C | C | C | C | G                 | Kasalath-type allele |
| Urasan 1           | WRC 51             | Japan         | <i>Oryza sativa</i> ssp. <i>japonica</i> | T                                       | T  | G  | G  | G  | C  | C   | C   | C   | C   | C   | C   | C   | C   | C | C | C | C | C | C | G                 | Kasalath-type allele |
| Khao Nam Jen       | WRC 68             | Laos          | <i>Oryza sativa</i> ssp. <i>japonica</i> | T                                       | T  | G  | G  | G  | C  | C   | C   | C   | C   | C   | C   | C   | C   | C | C | C | C | C | C | G                 | Kasalath-type allele |
| Khau Tan Chiem     | WRC 52             | Vietnam       | <i>Oryza sativa</i> ssp. <i>japonica</i> | T                                       | T  | G  | G  | G  | C  | C   | C   | C   | C   | C   | C   | C   | C   | C | C | C | C | C | C | G                 | Kasalath-type allele |
| Nipponbare         | WRC 01             | Japan         | <i>Oryza sativa</i> ssp. <i>japonica</i> | T                                       | T  | G  | G  | G  | C  | C   | C   | C   | C   | C   | C   | C   | C   | C | C | C | C | C | C | G                 | Kasalath-type allele |

continued

**Table S4**

**Table S4. *O. rufipogon* accession list**

| Sequence ID | Accession No.      | Origin      | Group               | Annual | Perennial | Allele                         |
|-------------|--------------------|-------------|---------------------|--------|-----------|--------------------------------|
| W1          | W2265              | Laos        | <i>O. rufipogon</i> | Annual | -         | Different allele from Kasalath |
| W2          | W2014              | India       | <i>O. rufipogon</i> | -      | -         | Different allele from Kasalath |
| W3          | AS067              | Thailand    | <i>O. rufipogon</i> | -      | -         | Different allele from Kasalath |
| W4          | W0106              | India       | <i>O. rufipogon</i> | -      | -         | Kasalath allele                |
| W5          | AS049              | Sri Lanka   | <i>O. rufipogon</i> | Annual | -         | Different allele from Kasalath |
| W8          | AS052              | Nepal       | <i>O. rufipogon</i> | Annual | -         | Different allele from Kasalath |
| W9          | AS081              | Vietnam     | <i>O. rufipogon</i> | -      | -         | Different allele from Kasalath |
| W10         | W0108              | India       | <i>O. rufipogon</i> | -      | Perennial | Different allele from Kasalath |
| W11         | IRGC105402         | China       | <i>O. rufipogon</i> | -      | -         | Different allele from Kasalath |
| W12         | W1294              | Philippines | <i>O. rufipogon</i> | -      | Perennial | Different allele from Kasalath |
| W13         | W1943              | China       | <i>O. rufipogon</i> | Annual | -         | Different allele from Kasalath |
| W14         | AS085              | China       | <i>O. rufipogon</i> | -      | -         | Different allele from Kasalath |
| W15         | W1681              | India       | <i>O. rufipogon</i> | -      | -         | Kasalath allele                |
| W16         | W0593              | Malaysia    | <i>O. rufipogon</i> | -      | -         | Different allele from Kasalath |
| W17         | W1715              | China       | <i>O. rufipogon</i> | -      | Perennial | Different allele from Kasalath |
| W18         | W1865              | Thailand    | <i>O. rufipogon</i> | -      | -         | Kasalath allele                |
| W19         | W0137              | India       | <i>O. rufipogon</i> | -      | -         | Different allele from Kasalath |
| W20         | W1944              | China       | <i>O. rufipogon</i> | -      | -         | Kasalath allele                |
| W21         | W1685              | India       | <i>O. rufipogon</i> | Annual | -         | Kasalath allele                |
| W22         | IRGC101508         | India       | <i>O. rufipogon</i> | -      | -         | Different allele from Kasalath |
| W23         | AS062              | Laos        | <i>O. rufipogon</i> | -      | -         | Kasalath allele                |
| W25         | W2264              | Vietnam     | <i>O. rufipogon</i> | -      | Perennial | Different allele from Kasalath |
| W26         | W1551              | Thailand    | <i>O. rufipogon</i> | -      | -         | Kasalath allele                |
| W28         | W2003              | India       | <i>O. rufipogon</i> | -      | -         | Different allele from Kasalath |
| W29         | AS059              | Bangladesh  | <i>O. rufipogon</i> | -      | -         | Kasalath allele                |
| W30         | W1852              | Thailand    | <i>O. rufipogon</i> | Annual | -         | Kasalath allele                |
| W31         | W1669              | India       | <i>O. rufipogon</i> | -      | -         | Kasalath allele                |
| W32         | AS051              | Nepal       | <i>O. rufipogon</i> | -      | -         | Different allele from Kasalath |
| W34         | W0574 (IRGC105491) | Malaysia    | <i>O. rufipogon</i> | -      | -         | Different allele from Kasalath |
| W35         | IRGC105908         | Thailand    | <i>O. rufipogon</i> | -      | -         | Kasalath allele                |
| W36         | W1981              | Indonesia   | <i>O. rufipogon</i> | -      | -         | Different allele from Kasalath |
| W37         | W0107              | India       | <i>O. rufipogon</i> | -      | -         | Kasalath allele                |
| W38         | W2266              | Laos        | <i>O. rufipogon</i> | -      | Perennial | Different allele from Kasalath |
| W39         | W0610              | Myanmar     | <i>O. rufipogon</i> | -      | -         | Kasalath allele                |

**Table database S1. Differentially expressed gene list.** The database contains a list of significantly (FDR < 0.05) up- or down-regulated genes with 2-fold or 1/2-fold change in both *GW6a-4.6* and *OsglHAT1*-OE compared to Nipp. Fold change is indicated as a  $\log_{10}$  value.

**Table database S2. Enriched GO term.** Genes listed in Database 1 were subjected to GO enrichment analysis. Database 2 includes significantly enriched GO terms (FDR < 0.05) for biological process (P), molecular function (F) and cellular component (C). Genes annotated with each enriched GO term are listed in the “entries” column. “bgitem”, the background number of genes annotated with the GO term; “querytotal”, the number of genes annotated with GO terms in the genes subjected to analysis; “queryitem”, the number of genes annotated with the GO term in the genes subjected to analysis.

## Supplementary references

1. Liu Y, et al. (1999) Complementation of plant mutants with large genome DNA fragments by a transformation-competent artificial chromosome vector accelerates positional cloning. *Proc. Natl. Acad. Sci. USA* 96: 6535-6540.
2. Nishimura A, Aichi I, Matsuoka M (2006) A protocol for Agrobacterium-mediated transformation in rice. *Nat Protocols* 1: 2796-2802.
3. Song X, et al. (2007) A QTL for rice grain width and weight encodes a previously unknown RING-type E3 ubiquitin ligase. *Nat Genet* 39: 623-630.
4. Jang I, Yang J, Seo H, Chua N (2005) HFR1 is targeted by COP1 E3 ligase for post-translational proteolysis during phytochrome A signaling. *Genes Dev* 19: 593-602.
5. Clough S, Bent A (1998) Floral dip: a simplified method for Agrobacterium-mediated transformation of *Arabidopsis thaliana*. *Plant J* 16: 735-743.
6. Kouchi H, Hata S (1993) Isolation and characterization of novel nodulin cDNAs representing genes expressed at early stages of soybean nodule development. *Mol Gen Genet* 238: 106-119.
7. Ge L, et al. (2010) Arabidopsis ROOT UVB SENSITIVE2/WEAK AUXIN RESPONSE1 is required for polar auxin transport. *Plant Cell* 22:1749-1761.
8. Yamamoto Y, et al. (2010) A rice *gid1* suppressor mutant reveals that gibberellin is not always required for interaction between its receptor, GID1, and DELLA proteins. *Plant Cell* 22: 3589-3602.
9. Yanagisawa S, Yoo S, Sheen J (2003) Differential regulation of EIN3 stability by glucose and ethylene signalling in plants. *Nature* 425: 521-525.
10. Studer A, et al. (2011) Identification of a functional transposon insertion in the maize domestication gene *tb1*. *Nat Genet* 43: 1160-1163.
11. Abramoff M, Magalhaes P, Ram S (2004) Image processing with ImageJ. *Biophotonics Int.* 11: 36-41.
12. Langmead B, Trapnell C, Salzberg S (2009) Ultrafast and memory-efficient alignment of short DNA sequences to the human genome. *Genome Biol* 10: R25.

13. Kadota K, Nishiyama T, Shimizu K (2012) A normalization strategy for comparing tag count data. *Algorithms for molecular biology* 7: 5.
14. Du Z, et al. (2010) agriGO: a GO analysis toolkit for the agricultural community. *Nucleic Acids Res* 38: W64-70.
15. Librado P, Rozas (2009) J DnaSP v5: a software for comprehensive analysis of DNA polymorphism data. *Bioinformatics* 25: 1451-1452.
16. Gao L, Innan H (2008) Nonindependent domestication of the two rice subspecies, *Oryza sativa* ssp. *Indica* and ssp. *Japonica*, demonstrated by multilocus microsatellites. *Genetics* 179: 965-976.
17. Tajima F (1983) Evolutionary relationship of DNA sequences in finite populations. *Genetics* 105: 437-460.
18. Watterson G (1975) On the number of segregating sites in genetical models without recombination. *Theor Popul Biol* 7: 256-276.
19. Tajima F (1989) Statistical method for testing the neutral mutation hypothesis by DNA polymorphism. *Genetics* 123: 585-595.
